# Supplementary material for: Changing role of coral reef marine reserves in a warming climate
Source: PubMed Central journal article supplement (PMC7181733; doi:10.1038/s41467-020-15863-z), 2020-04-24
Supplement: 41467_2020_15863_MOESM1_ESM.pdf [file 41467_2020_15863_MOESM1_ESM.pdf]

# Supplementary Information

**The Changing Role of Coral Reef Marine Reserves in a Warming Climate**

Graham et al.

## Supplementary Figures

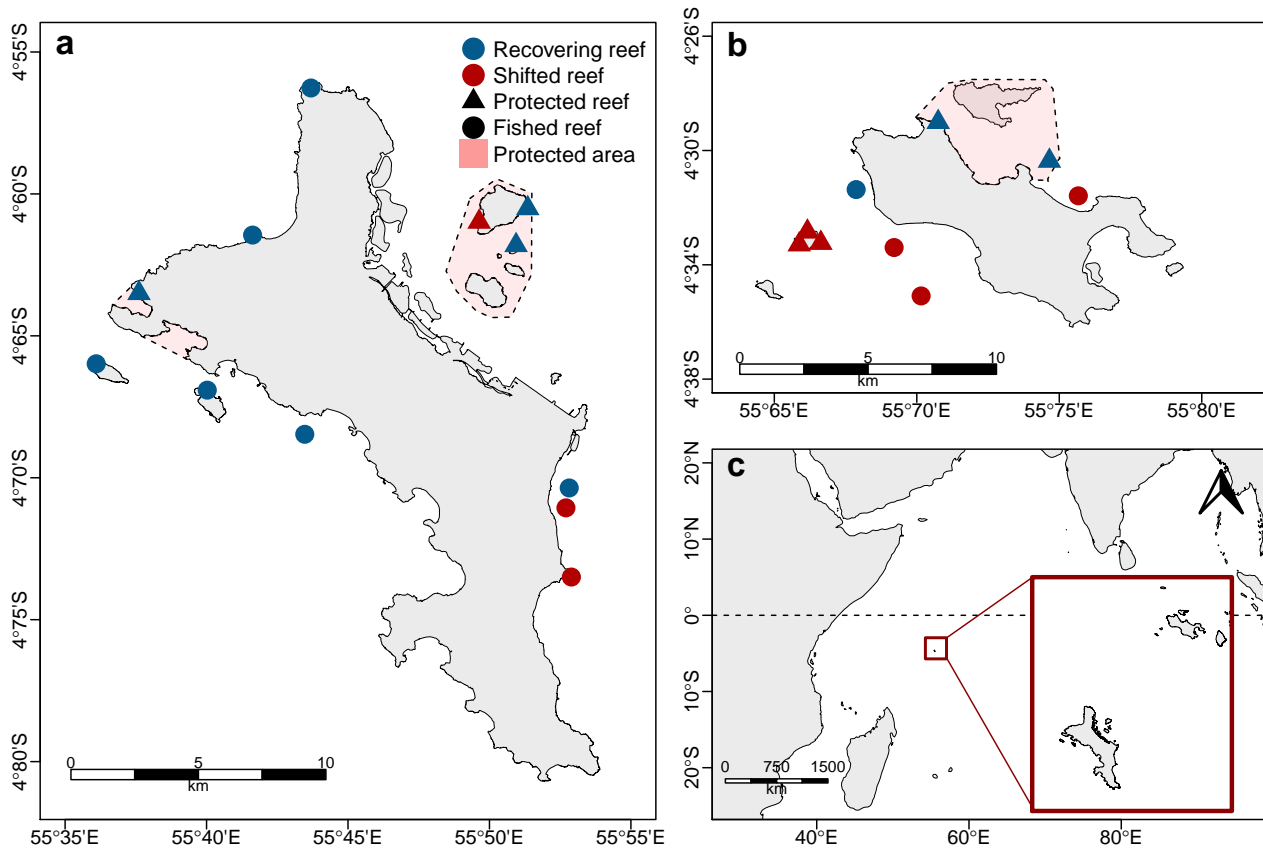

**Supplementary Figure 1.** Map of study sites on Mahe (a) and Praslin (b), and inner Seychelles location in the Western Indian Ocean (c). Recovering reefs are blue and regime-shifted reefs are red. Circles indicated fished reefs and triangles indicated protected reefs in marine reserves (pink shading).

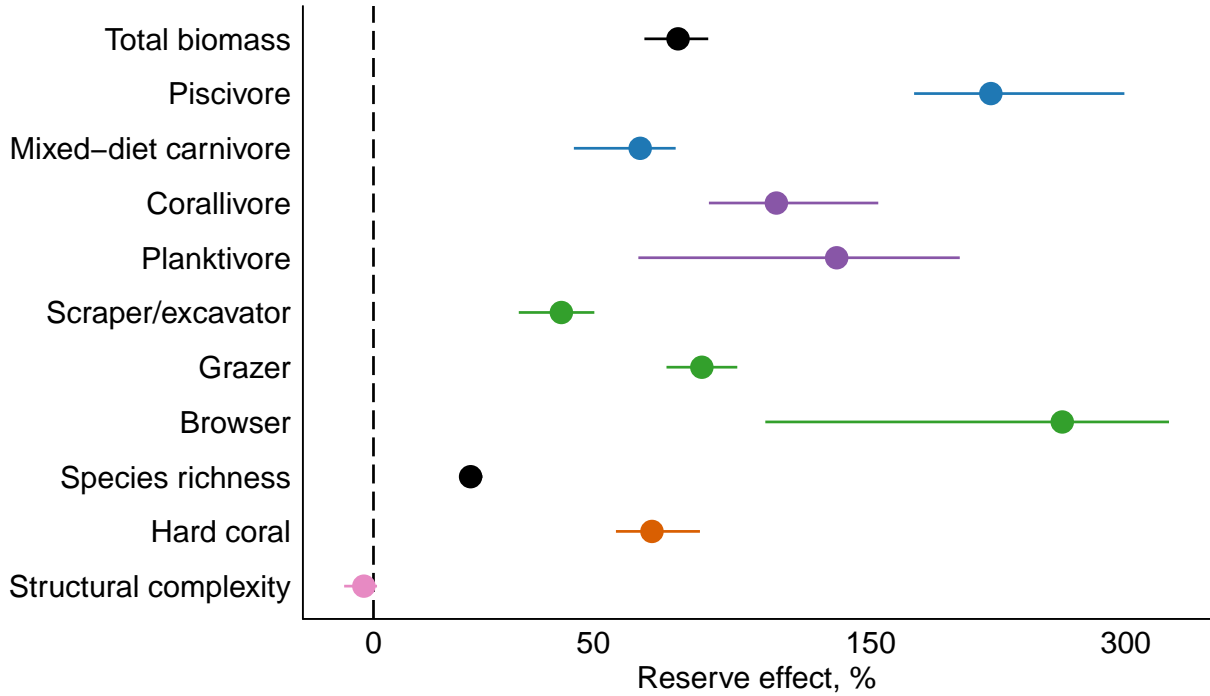

**Supplementary Figure 2.** Marine reserve effects before mass coral bleaching. Points are the reserve response ratio( $\log(\text{reserve}/\text{fished})$ ) for each ecological variable on nine reef reserves relative to 12 fished reefs (0% = equal values on reserve and fished reefs). Error bars are drop-one jackknife confidence intervals showing the variance in reserve effects attributable to individual reef sites. Pre-bleaching macroalgal cover was negligible at all 21 sites and is excluded here (mean = 1.2%  $\pm$  5.66 standard error, SE). Corresponding raw reserve effect values provided in Figure 1. Source data are provided as a Source Data file.

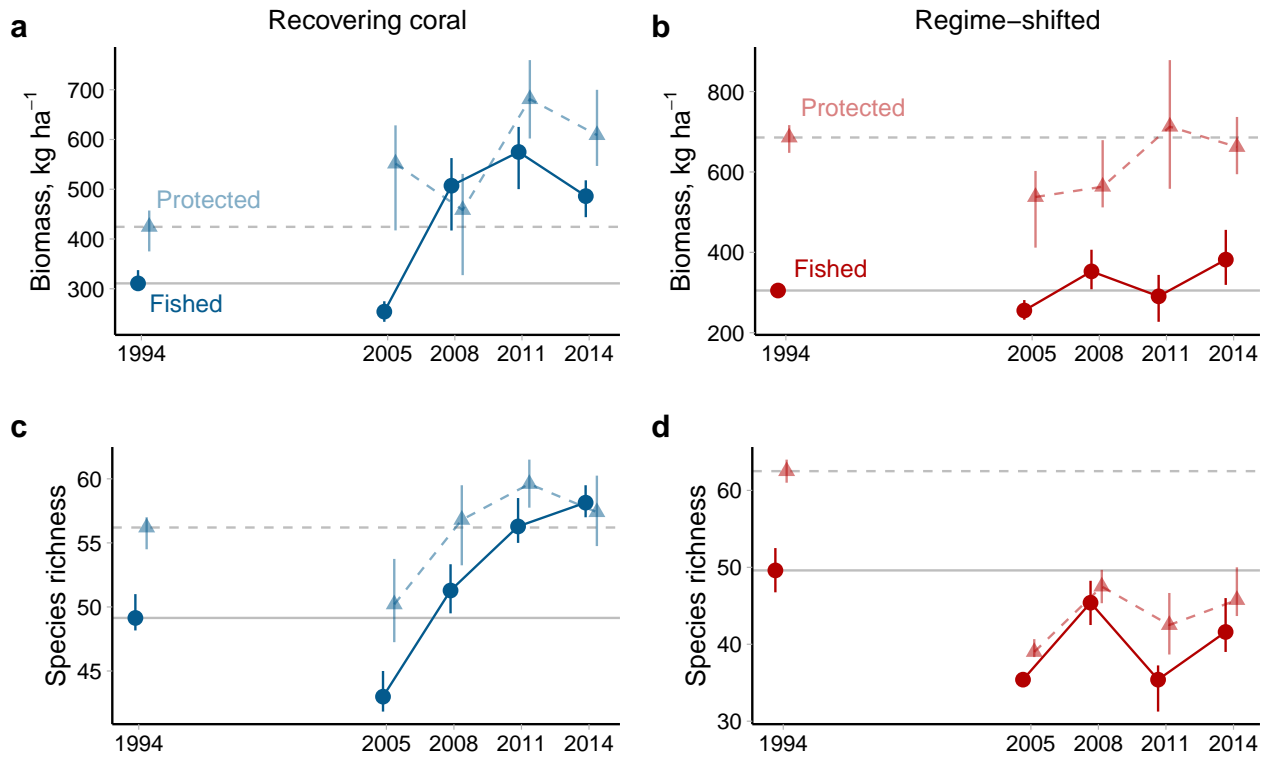

**Supplementary Figure 3.** Fish biomass (a,b) and species richness (c,d) from 1994-2014 at each reef in protected (dashed lines and triangles) and fished areas (solid lines and circles), for recovering (blue) and regime-shifted (red) habitats (n sites = 7 fished-recovering, 5 protected-recovering, 5 fished-shifted, 4 protected-shifted). Points are mean biomass or richness, with drop-one jackknife confidence limits. Source data are provided as a Source Data file.

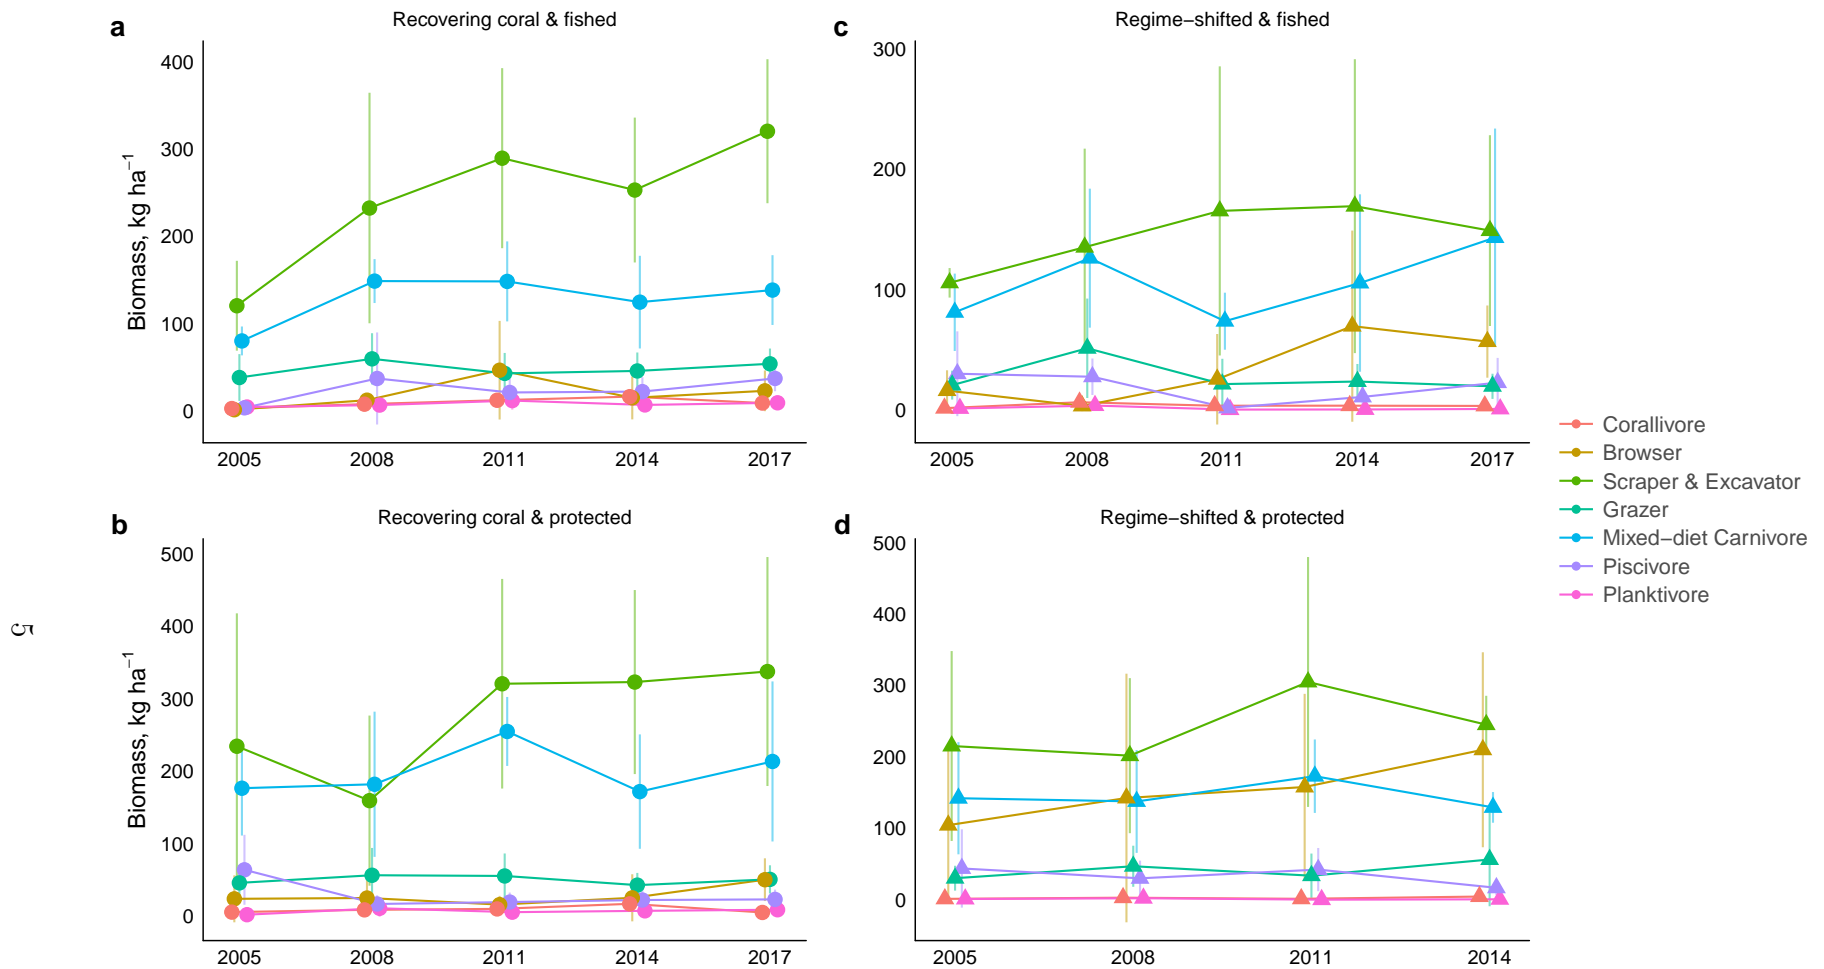

**Supplementary Figure 4.** Post-bleaching fish biomass of functional feeding groups from 2005-2014. Points are observed fish biomass ( $\pm 2$  SE) for each functional feeding group (colours), in reefs that were recovering and fished (a,  $n = 7$ ), recovering and protected (b,  $n = 5$ ), regime-shifted and fished (c,  $n = 5$ ) and regime-shifted and protected (d,  $n = 4$ ).

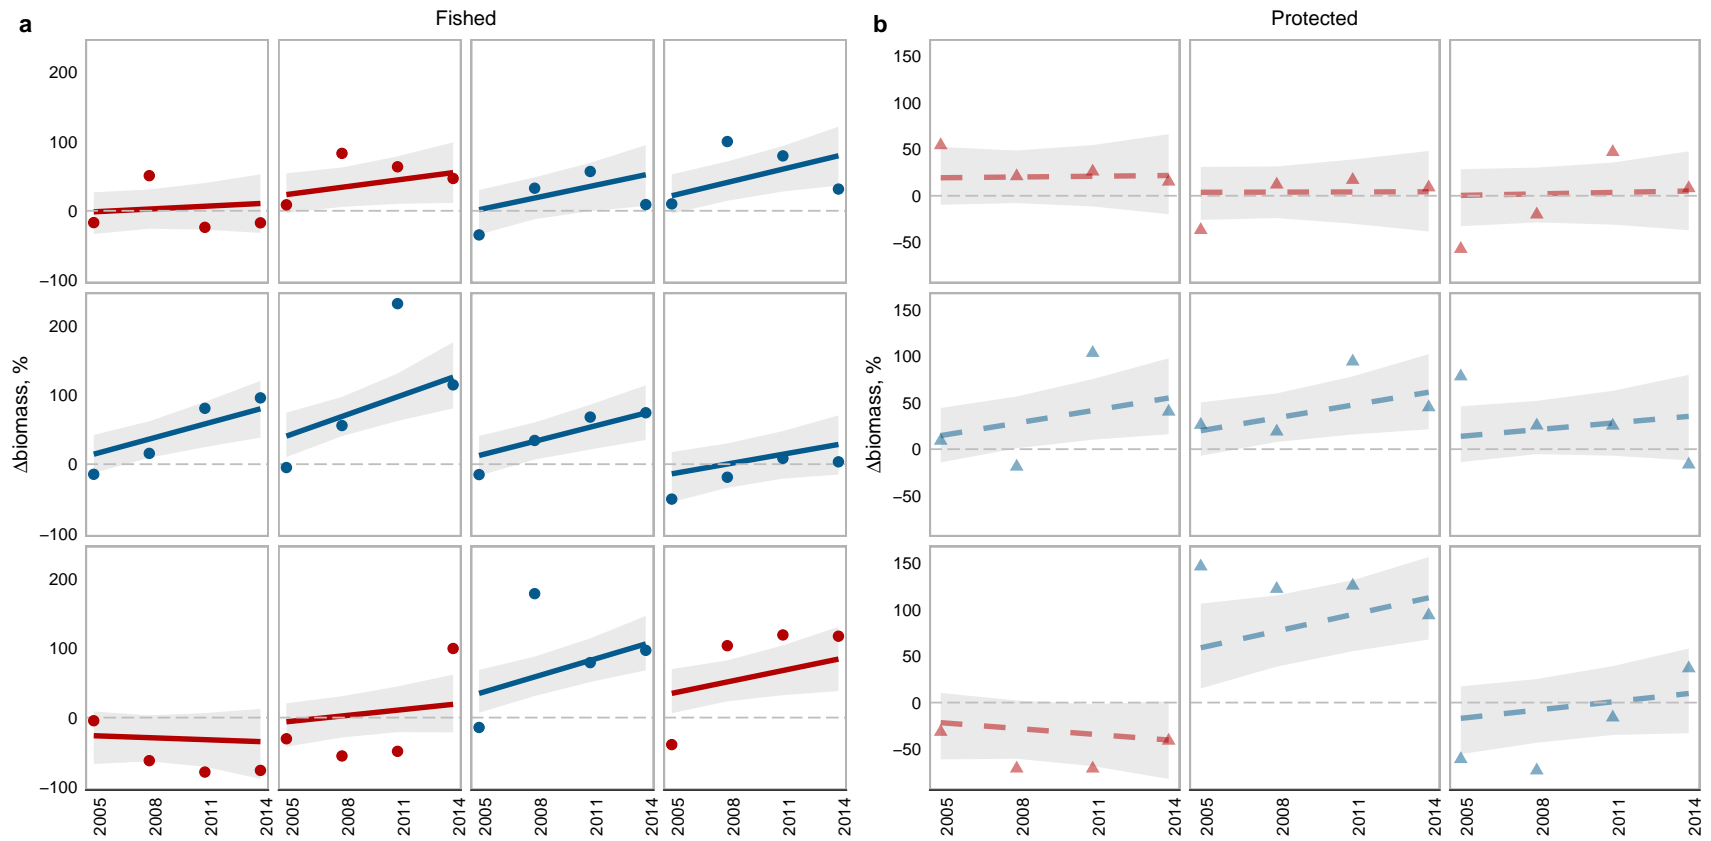

**Supplementary Figure 5.** Post-bleaching marine reserve effects on fish biomass of fish assemblages from 2005-2014 for individual reef sites. Panels show the recovery of biomass relative to pre-bleaching levels ( $y = 0$ , dashed grey line), for fished (a) and protected (b) reefs. Lines are posterior median predictions for each reef site ( $\pm 95\%$  certainty intervals), for recovering (blue) and regime-shifted (red) habitats. Points are observed data ( $n$  sites = 7 fished-recovering, 5 protected-recovering, 5 fished-shifted, 4 protected-shifted).

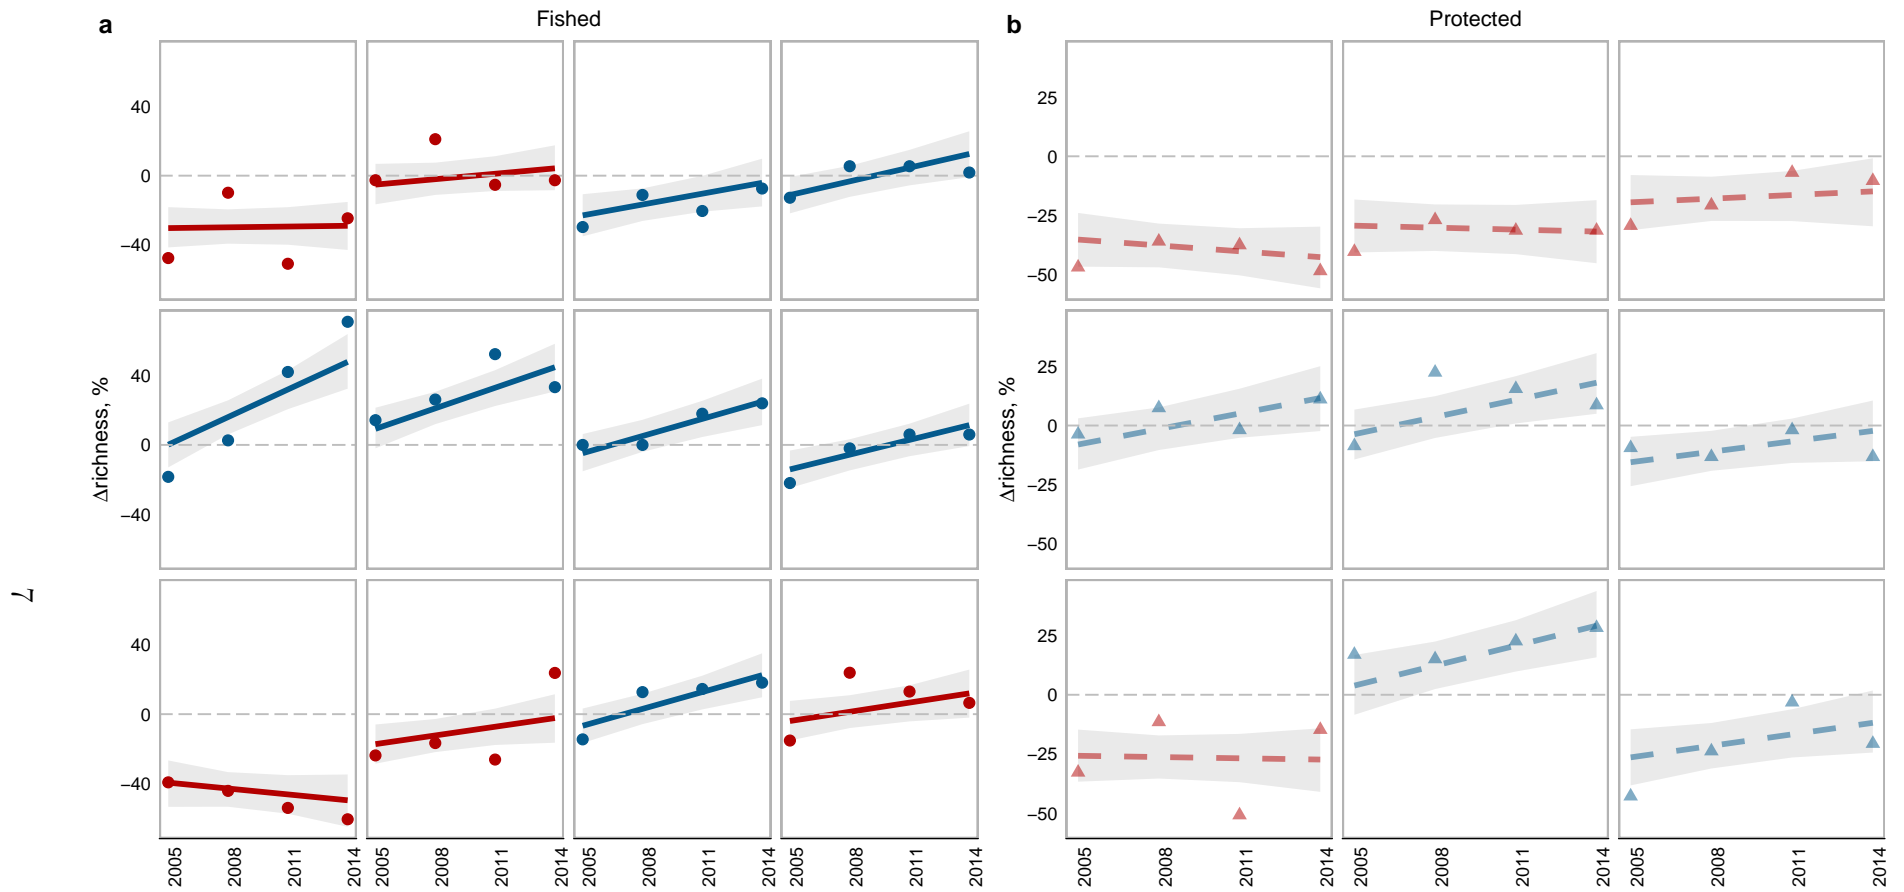

**Supplementary Figure 6.** Post-bleaching marine reserve effects on species richness of fish assemblages from 2005-2014 for individual reef sites. Panels show the recovery of species richness relative to pre-bleaching levels ( $y = 0$ , dashed grey line), for fished (a) and protected (b) reefs. Lines are posterior median predictions for each reef site ( $\pm 95\%$  certainty intervals), for recovering (blue) and regime-shifted (red) habitats. Points are observed data (n sites = 7 fished-recovering, 5 protected-recovering, 5 fished-shifted, 4 protected-shifted).

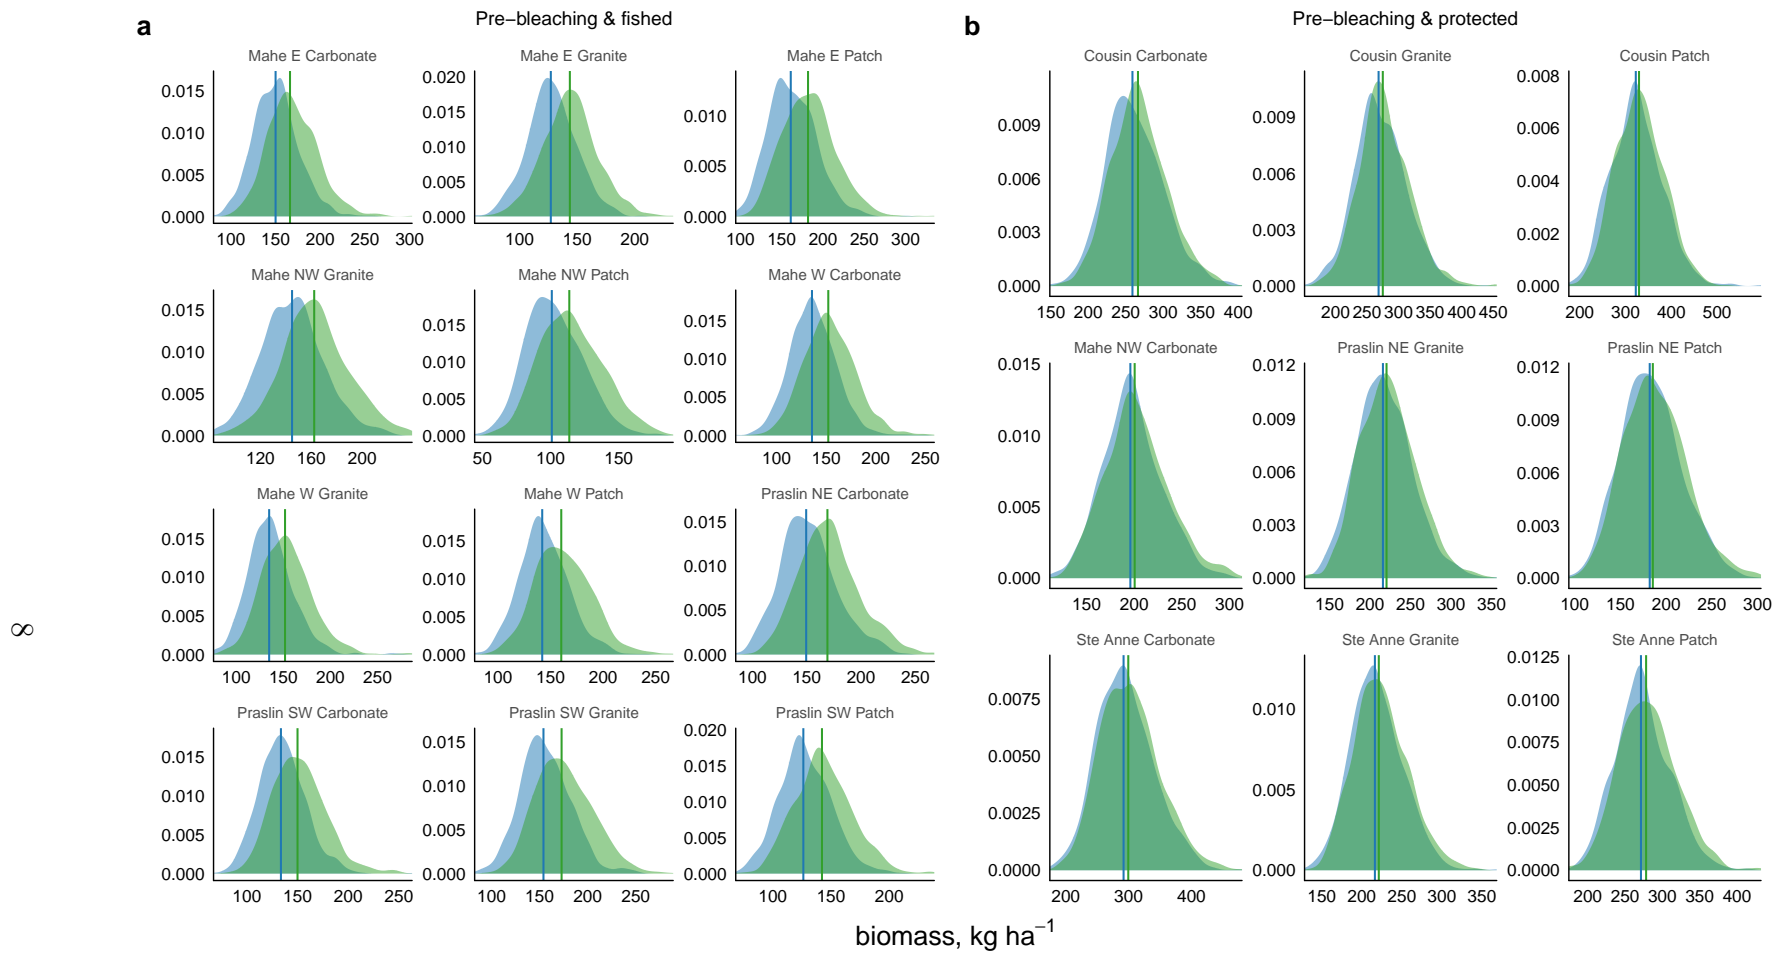

**Supplementary Figure 7.** Posterior distributions of carnivore and herbivore biomass before coral bleaching at each reef site. For fished (a) and protected (b) reefs, density curves are the posterior distributions of carnivore (blue) and herbivore (green) biomass before bleaching (1994 surveys), with vertical lines indicate median biomass and labelled with site names (y-axis = density).



Post-bleaching recovering coral

Fished

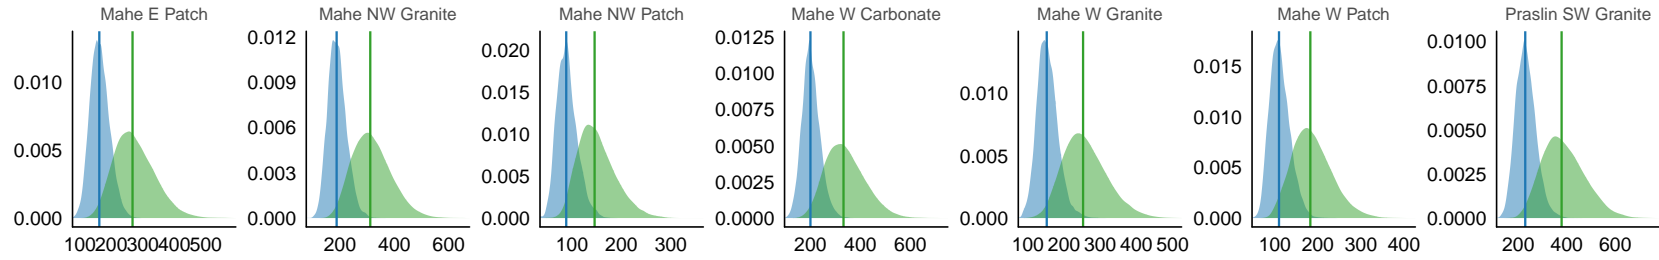

b

Protected

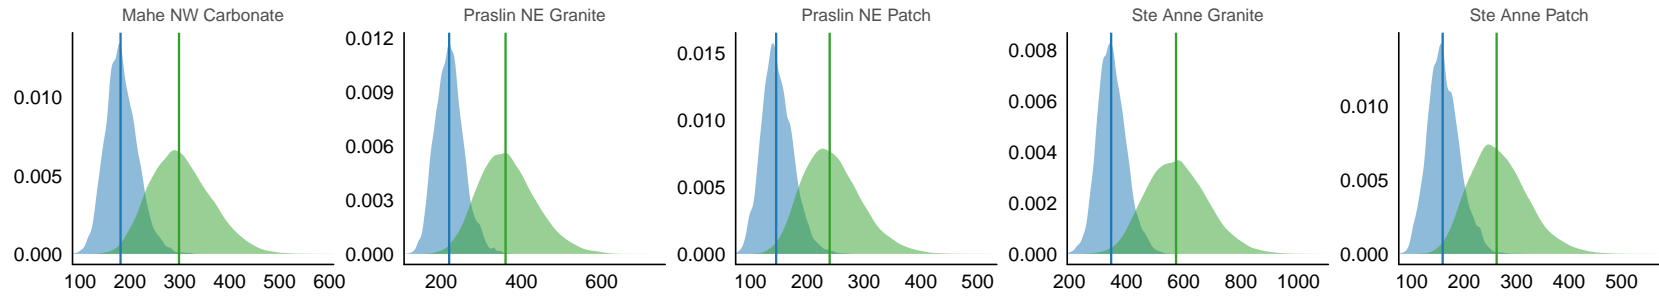

biomass,  $\text{kg ha}^{-1}$

**Supplementary Figure 8.** Posterior distributions of carnivore and herbivore biomass after coral bleaching on recovering reefs. For fished (a) and protected (b) reefs, density curves are the posterior distributions of carnivore (blue) and herbivore (green) biomass after bleaching (2005-2014 surveys), with vertical lines indicate median biomass and labelled with site names (y-axis = density).

Post-bleaching regime-shifted

Fished

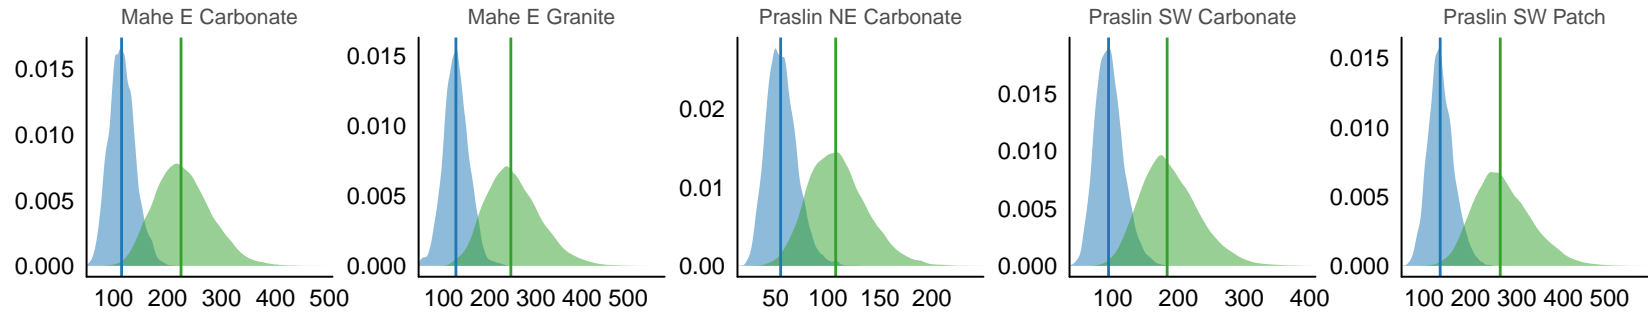

b

Protected

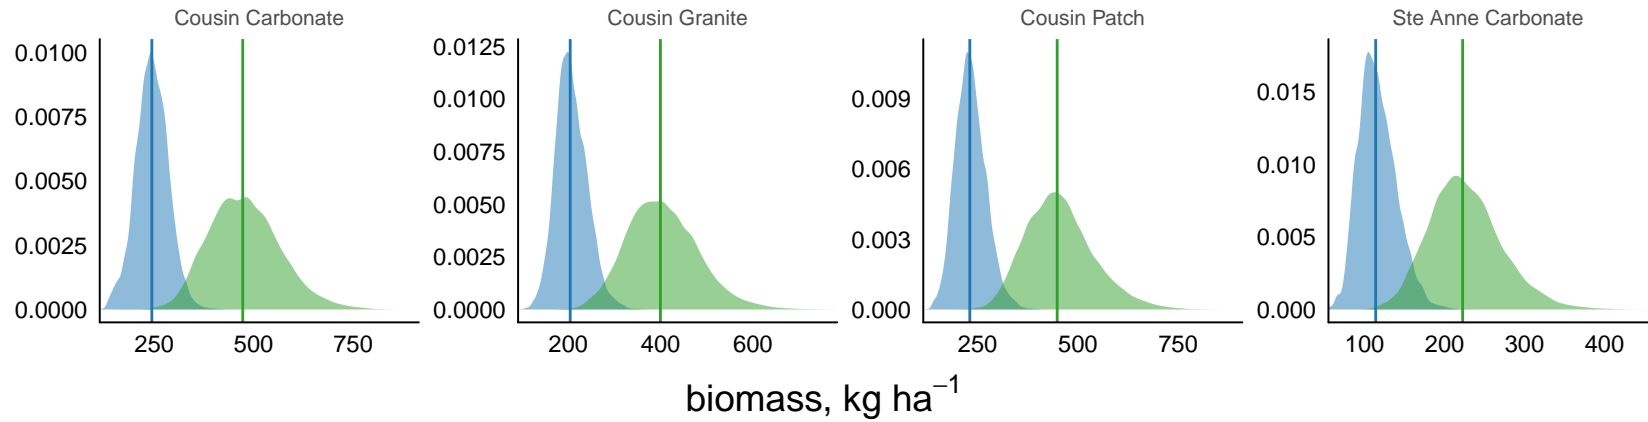

10

**Supplementary Figure 9.** Posterior distributions of carnivore and herbivore biomass after coral bleaching on regime-shifted reefs. For fished (a) and protected (b) reefs, density curves are the posterior distributions of carnivore (blue) and herbivore (green) biomass after bleaching (2005-2014 surveys), with vertical lines indicate median biomass and labelled with site names (y-axis = density).

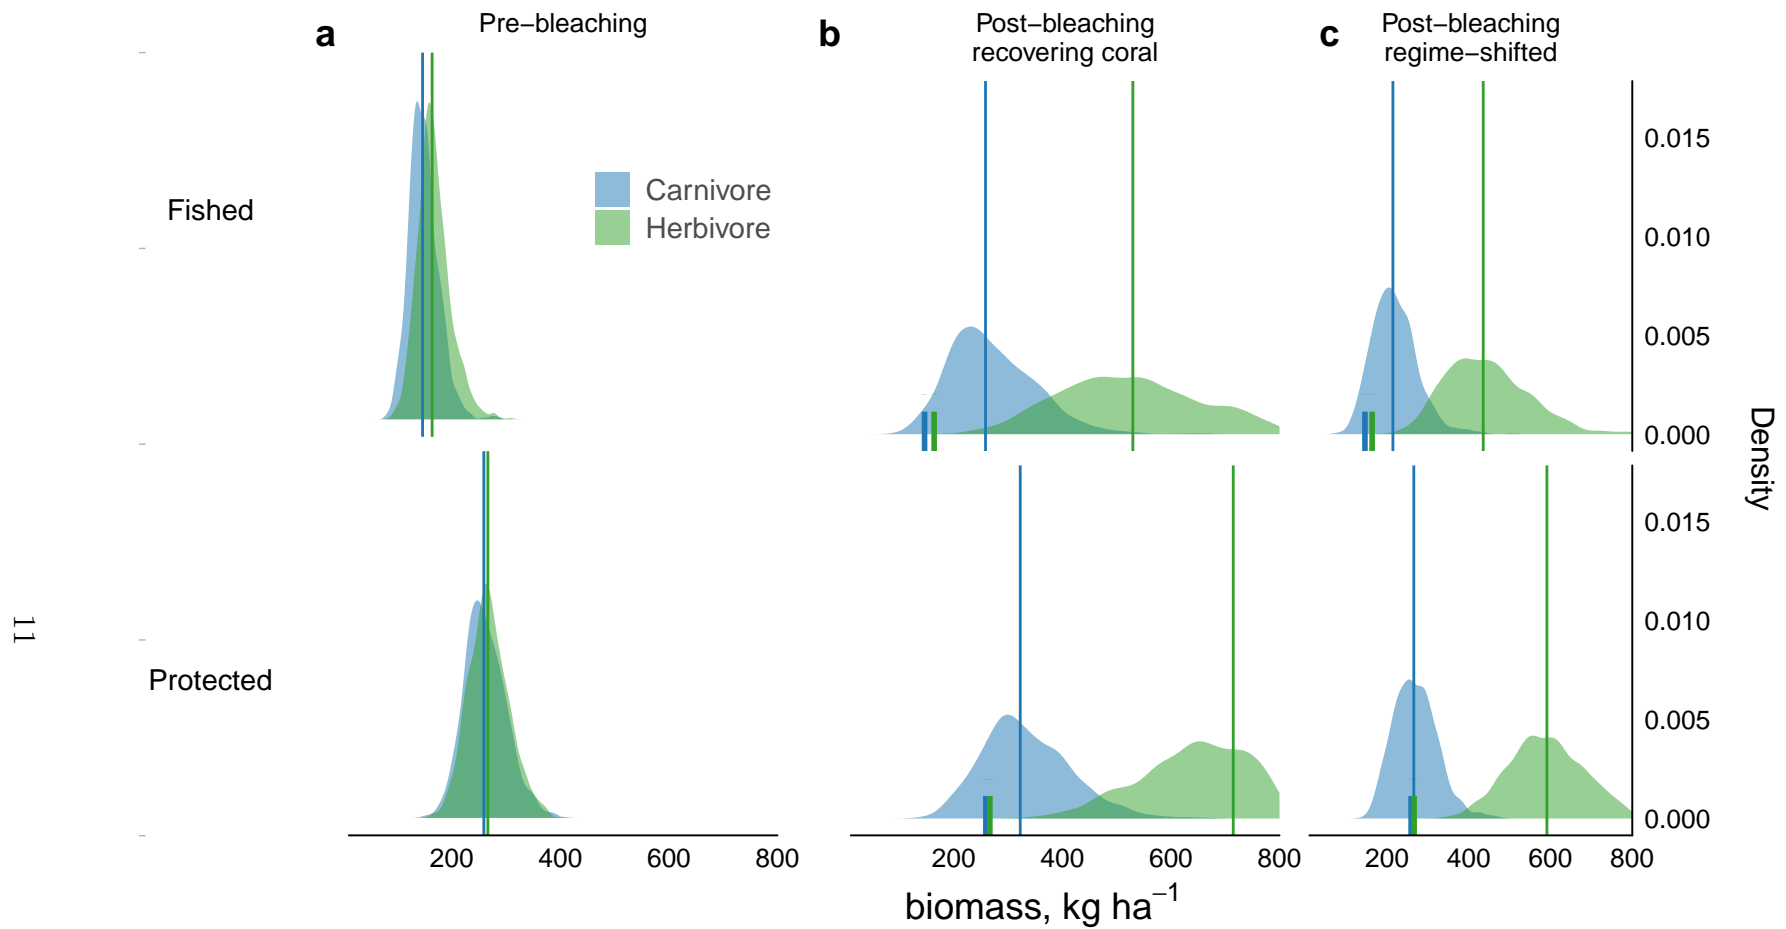

**Supplementary Figure 10.** Posterior distributions of carnivore and herbivore biomass after coral bleaching on regime-shifted reefs, including 2017 survey data. Marine reserve effects on carnivore and herbivore biomass before and after coral bleaching. For fished (top) and protected (bottom) reefs, density curves are the posterior distributions of carnivore (blue) and herbivore (green) biomass before (a) and after bleaching for recovering coral (b) and regime-shifted (c) reefs. Vertical lines indicate median biomass, with short dashed lines indicating median 1994 biomass on post-bleaching panels (b, c).

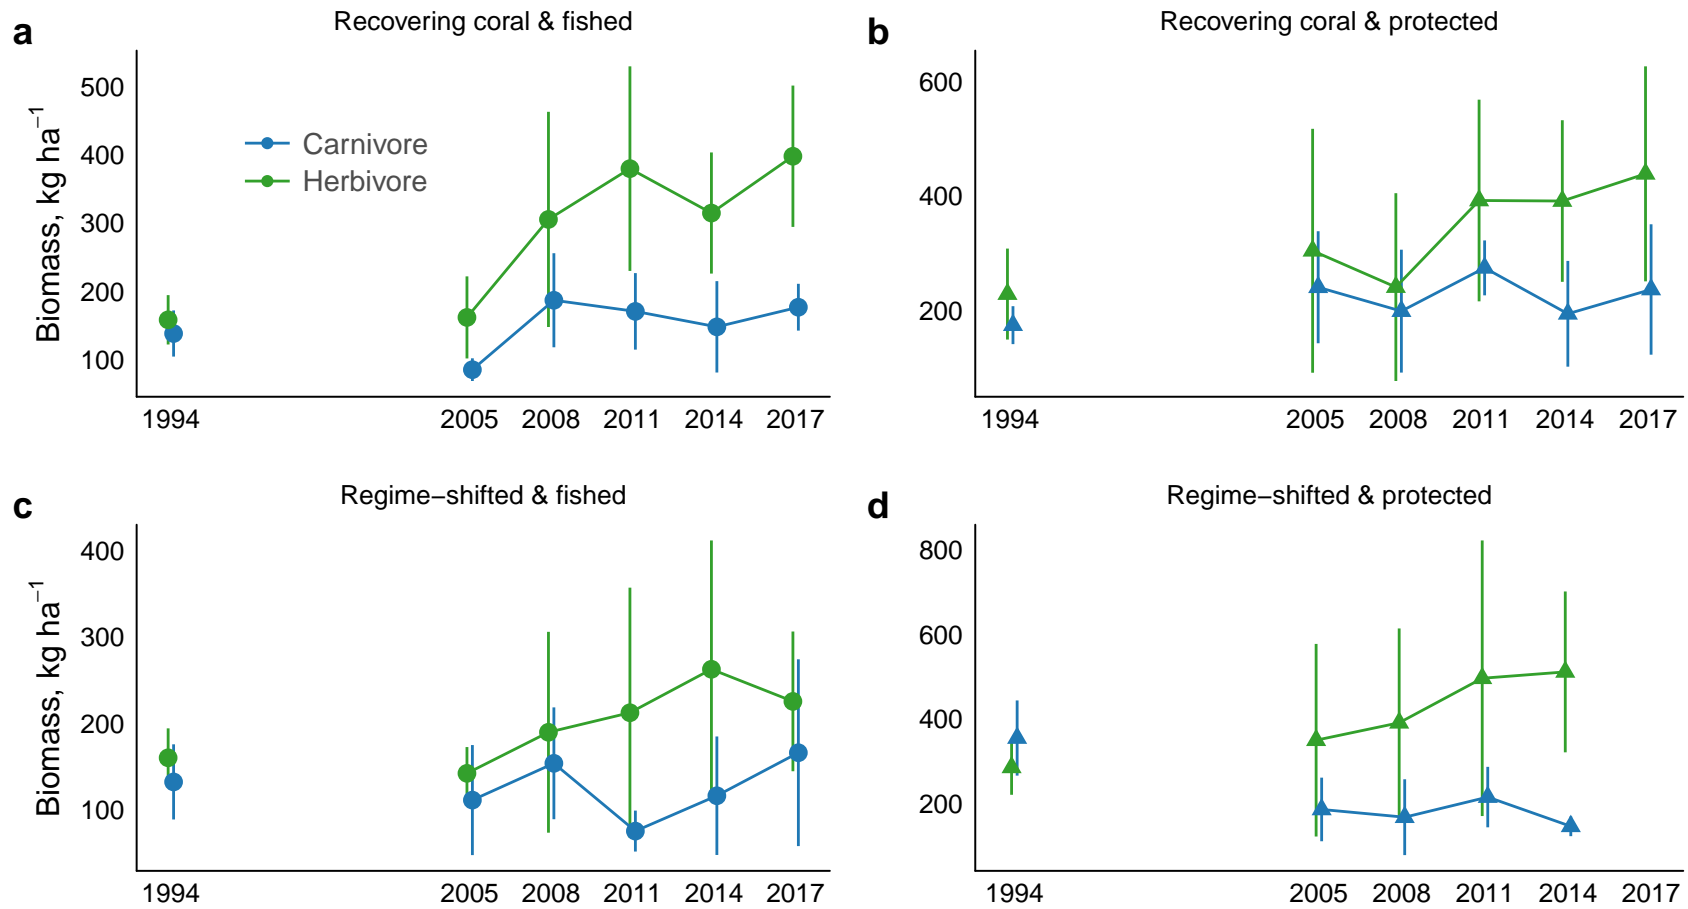

**Supplementary Figure 11.** Carnivore and herbivore biomass over 1994-2017 on recovering (a, b; top) and regime-shifted (c, d; bottom) reefs, for fished (left, circles) and protected areas (right, triangles). Points are mean biomass ( $\pm 2$  SE;  $n$  sites = 7 fished-recovering, 5 protected-recovering, 5 fished-shifted, 4 protected-shifted). Note 3 regime-shifted & protected reefs were not sampled in 2017 (d), and so were excluded from our main analyses.

**Supplementary Table 1.** Posterior means and model diagnostics for biomass and richness models (Methods, Eqs. 1,2). Mean, standard deviation (StdDev), 95% certainty intervals for fixed parameters, with effective samples (n\_eff) and Gelman-Rubin convergence diagnostic (Rhat).

| Model            | Covariate             | Parameter | Mean    | StdDev | lower 0.95 | upper 0.95 | n_eff | Rhat  |
|------------------|-----------------------|-----------|---------|--------|------------|------------|-------|-------|
| Total biomass    | Intercept             | $B_0$     | 8.937   | 7.658  | -6.271     | 23.837     | 12782 | 1.000 |
|                  | Shifted regime        | $B_1$     | 0.613   | 4.823  | -8.376     | 10.566     | 19617 | 1.000 |
|                  | Year                  | $B_2$     | 2.550   | 2.095  | -1.562     | 6.641      | 4865  | 1.000 |
|                  | Shifted regime * Year | $B_3$     | 4.178   | 2.246  | -0.300     | 8.404      | 7141  | 1.000 |
|                  | Protection            | $B_4$     | -0.305  | 4.764  | -9.471     | 9.111      | 18499 | 1.000 |
|                  | Protection * Year     | $B_5$     | -2.618  | 2.244  | -6.898     | 1.929      | 8219  | 1.000 |
|                  | $\sigma$              | $\sigma$  | 46.248  | 4.753  | 37.293     | 55.698     | 1690  | 1.001 |
| Species richness | Intercept             | $B_0$     | -16.644 | 5.416  | -27.215    | -6.069     | 7580  | 1.001 |
|                  | Shifted regime        | $B_1$     | 6.477   | 6.080  | -5.820     | 17.918     | 8173  | 1.001 |
|                  | Year                  | $B_2$     | 0.870   | 0.904  | -0.878     | 2.672      | 9395  | 1.000 |
|                  | Shifted regime * Year | $B_3$     | 2.420   | 1.044  | 0.342      | 4.434      | 9366  | 1.000 |
|                  | Protection            | $B_4$     | -4.624  | 6.071  | -16.423    | 7.217      | 11083 | 1.000 |
|                  | Protection * Year     | $B_5$     | -1.148  | 1.006  | -3.179     | 0.812      | 10671 | 1.000 |
|                  | $\sigma$              | $\sigma$  | 12.744  | 1.368  | 10.085     | 15.400     | 3695  | 1.001 |

**Supplementary Table 2.** Posterior means and model diagnostics for carnivore/herbivore biomass models (Methods, Eqs. 3-5). Mean, standard deviation (StdDev), 95% certainty intervals, effective samples (n\_eff) and Gelman-Rubin convergence diagnostic (Rhat).

| Model                             | Covariate                    | Parameter                     | Mean           | StdDev | lower 0.95 | upper 0.95 | n_eff | Rhat  |
|-----------------------------------|------------------------------|-------------------------------|----------------|--------|------------|------------|-------|-------|
| 1994 dataset (Eq. 4)              | Protection [carnivore]       | $B_{1\_fg}[1]$                | 0.076          | 0.625  | -1.296     | 1.493      | 1890  | 1.001 |
|                                   | Protection [herbivore]       | $B_{1\_fg}[2]$                | -0.014         | 0.625  | -1.476     | 1.334      | 1905  | 1.001 |
|                                   | Intercept [carnivore]        | $B_{0\_fg}[1]$                | -0.049         | 0.913  | -2.028     | 1.689      | 976   | 1.005 |
|                                   | Intercept [herbivore]        | $B_{0\_fg}[2]$                | 0.065          | 0.912  | -1.810     | 1.915      | 984   | 1.005 |
|                                   | Intercept                    | $B_0$                         | 4.968          | 0.916  | 3.081      | 6.813      | 1000  | 1.004 |
|                                   | Protection                   | $B_1$                         | 0.495          | 0.634  | -0.839     | 1.945      | 1927  | 1.001 |
|                                   | <i>Gamma</i> scale parameter | $k$                           | 14.929         | 4.801  | 7.137      | 24.533     | 2422  | 1.001 |
|                                   | 2005-14 dataset (Eq. 5)      | Protection * Year [carnivore] | $B_{5\_fg}[1]$ | -0.039 | 0.616      | -1.328     | 1.356 | 1487  |
| Protection * Year [herbivore]     |                              | $B_{5\_fg}[2]$                | 0.022          | 0.616  | -1.198     | 1.489      | 1510  | 1.001 |
| Protection [carnivore]            |                              | $B_{4\_fg}[1]$                | 0.024          | 0.673  | -1.522     | 1.368      | 1314  | 1.002 |
| Protection [herbivore]            |                              | $B_{4\_fg}[2]$                | 0.015          | 0.673  | -1.497     | 1.380      | 1299  | 1.002 |
| Shifted regime * Year [carnivore] |                              | $B_{3\_fg}[1]$                | 0.026          | 0.685  | -1.327     | 1.545      | 589   | 1.002 |
| Shifted regime * Year [herbivore] |                              | $B_{3\_fg}[2]$                | 0.025          | 0.690  | -1.320     | 1.541      | 575   | 1.003 |
| Year [carnivore]                  |                              | $B_{2\_fg}[1]$                | -0.074         | 0.671  | -1.465     | 1.480      | 2574  | 1.001 |
| Year [herbivore]                  |                              | $B_{2\_fg}[2]$                | 0.034          | 0.669  | -1.275     | 1.681      | 2550  | 1.001 |
| Shifted regime [carnivore]        |                              | $B_{1\_fg}[1]$                | 0.115          | 0.756  | -1.498     | 1.824      | 1916  | 1.001 |
| Shifted regime [herbivore]        |                              | $B_{1\_fg}[2]$                | -0.050         | 0.756  | -1.600     | 1.708      | 1917  | 1.000 |
| Intercept [carnivore]             |                              | $B_{0\_fg}[1]$                | -0.293         | 1.621  | -3.469     | 2.566      | 1204  | 1.002 |
| Intercept [herbivore]             |                              | $B_{0\_fg}[2]$                | 0.377          | 1.623  | -2.760     | 3.280      | 1199  | 1.002 |
| Intercept                         |                              | $B_0$                         | 4.992          | 1.627  | 2.129      | 8.208      | 1213  | 1.003 |
| Shifted regime                    |                              | $B_1$                         | 0.148          | 0.778  | -1.563     | 1.796      | 1914  | 1.000 |
| Year                              |                              | $B_2$                         | 0.145          | 0.670  | -1.430     | 1.518      | 2549  | 1.001 |
| Shifted regime * Year             |                              | $B_3$                         | 0.001          | 0.689  | -1.572     | 1.297      | 579   | 1.003 |
| Protection                        |                              | $B_4$                         | 0.405          | 0.694  | -0.965     | 1.954      | 1352  | 1.002 |
| Protection * Year                 |                              | $B_5$                         | -0.064         | 0.616  | -1.459     | 1.234      | 1496  | 1.001 |
| <i>Gamma</i> scale parameter      | $k$                          | 46.763                        | 5.782          | 36.150 | 58.324     | 10836      | 1.000 |       |
